# Supplementary material
Source: publisher site journal article supplement (https://www.dovepress.com/article/supplementary_file/569608/569608_Appendix%20I%20-%20revised_changed%20tracked_corrected_1.docx)
Supplement: Supplementary file 1 [file 569608_Appendix%20I%20-%20revised_changed%20tracked_corrected_1.docx]

**Supplementary**

**Supplementary Figure 1. Interview Guide**

**
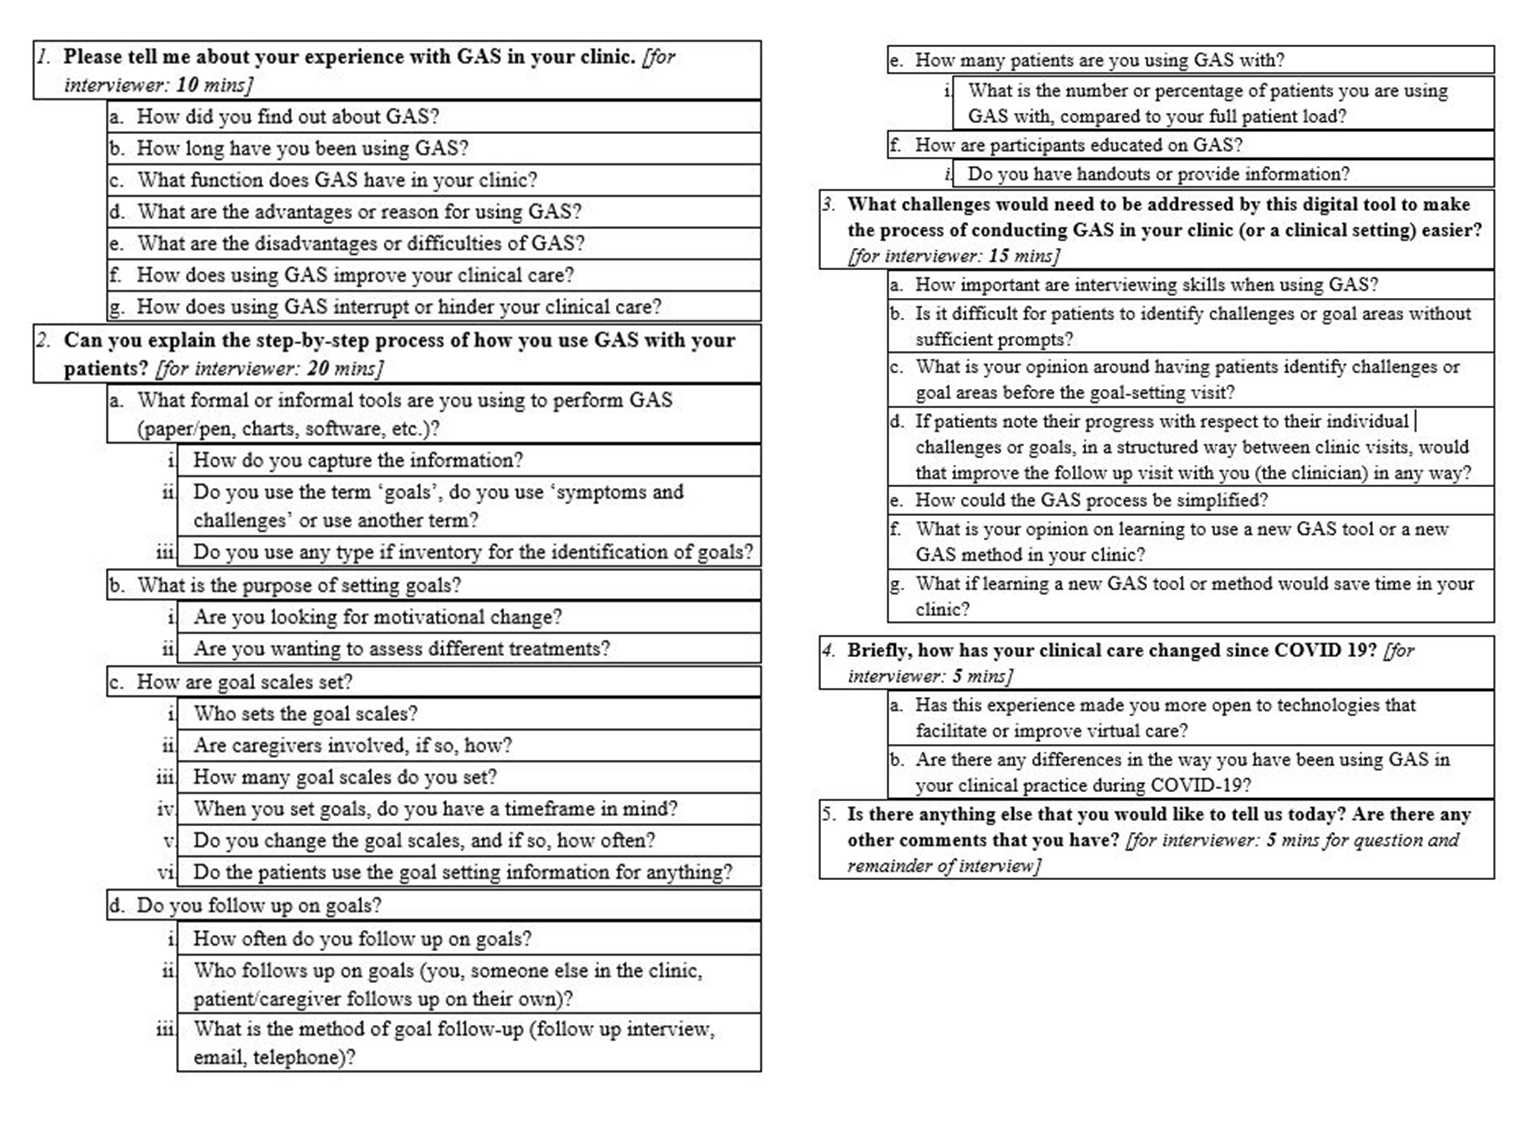
**

**Supplementary Table 1. Coding Tree for Analysis of GAS Data**

| **Category** | **Descriptor/project objectives** | **CODE:** |
| --- | --- | --- |
| 1. **Clinician Introduction and Current Usage of GAS** | How Clinician-Investigators are currently using Goal Attainment Scaling (GAS) in their clinics. | - Personal Experience Using GAS - How Clinician is Currently Using GAS |
| 1. **Process of GAS** | What is the current process when using GAS with patients? | - GAS Implementation - How Patients are Involved - GAS Interviewers - Training GAS Interviewers - Menu-Based GAS |
| 1. **Why the Clinician is Using GAS** | What are the benefits of GAS usage? | - Patient Centered Care - Benefits of Using GAS - Challenges with Other Outcome Measures - GAS Reliability |
| 1. **Challenges of GAS** | What are the current challenges in using GAS? | - Challenges of Using GAS - Barriers with the Healthcare System |
| 1. **Simplifying and Endorsing the GAS Process** | What is needed to make the process of conducting GAS in a clinical setting easier? | - Tool Development - Practice Affecting Changes - Barriers with the Health Care System |
